# Supplementary material for: Plate-like MFI crystal growth achieved by guanidine compounds
Source: Royal Society of Chemistry journal article supplement (doi:10.1039/d2qi00320a), 2022-01-01
Supplement: d2qi00320a1.pdf [file d2qi00320a1.pdf]

**Table S1.** The source of reagents used in this work <sup>a</sup>

| Reagent                                              | Manufacturer                                         | Content (wt.%) |
|------------------------------------------------------|------------------------------------------------------|----------------|
| Tetraethylorthosilicate (TEOS)                       | Tianjin Kermel Chemical Reagents Company             | ≥ 98.0         |
| Tetrapropylammonium hydroxide (TPAOH) solution       | Shanghai Bangcheng Chemical Reagents Company         | 25             |
| Al(NO <sub>3</sub> ) <sub>3</sub> ·9H <sub>2</sub> O | Beijing Chemical Reagents Company                    | ≥ 99.0         |
| Tetrabutyl orthotitanate (TBOT)                      | Sinopharm Chemical Reagent Co., Ltd.                 | ≥ 98           |
| Tetramethylguanidine (TMG)                           | Sass Chemical Reagents Company                       | 98             |
| Dodecylguanidine hydrochloride (DGH)                 | Shaoxing Shangyu Simo Institute of Organic Chemistry | ≥ 35           |
| Polyhexamethylene biguanidine hydrochloride (PHMB)   | Shanghai Dejian Chemical Co., Ltd.                   | 20             |

<sup>a</sup> All of the reagents were used without purification.

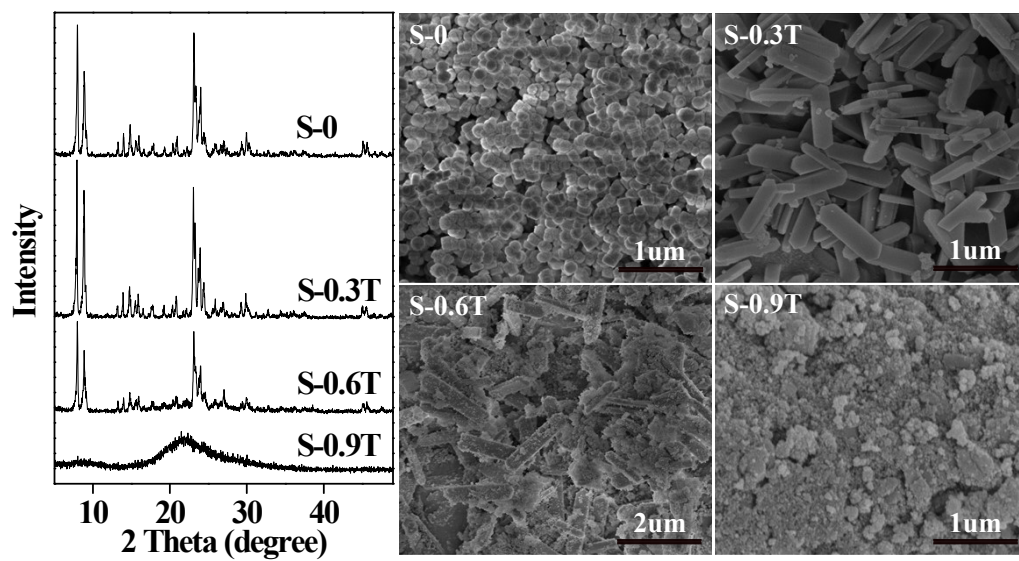

**Fig. S1** XRD patterns and SEM images of S-1 samples being synthesized in the presence of different amounts TMG.

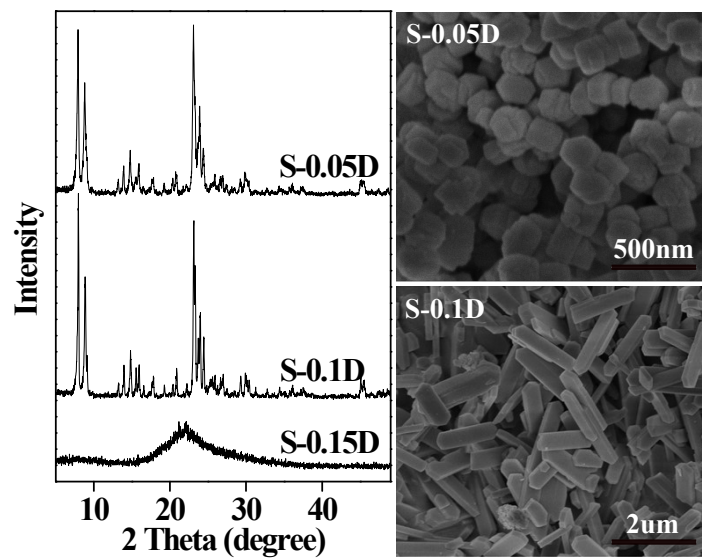

**Fig. S2** XRD patterns and SEM images of S-1 samples being synthesized in the presence of different amounts DGH.

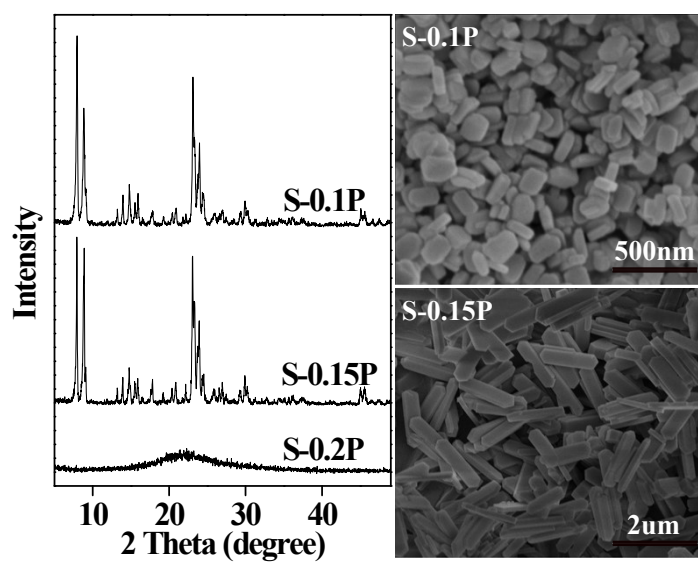

Fig. S3 XRD patterns and SEM images of S-1 samples being synthesized in the presence of different amounts PHMB.

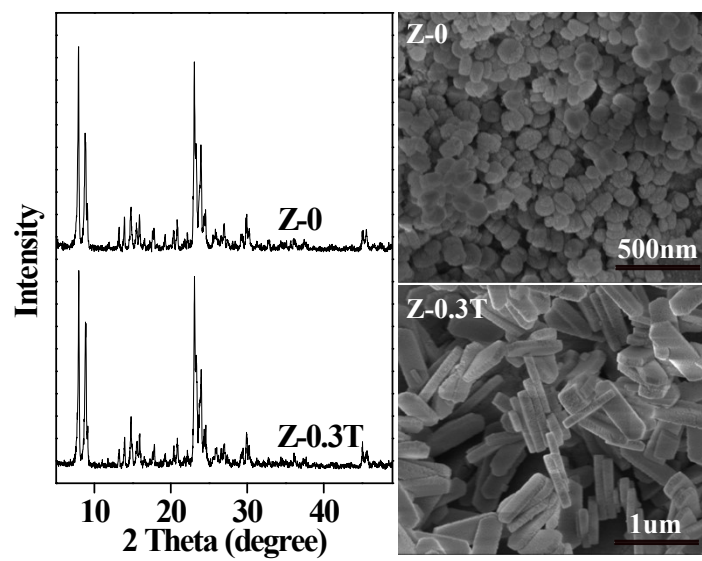

**Fig. S4** XRD patterns and SEM images of ZSM-5 samples being synthesized in the presence of different amounts TMG.

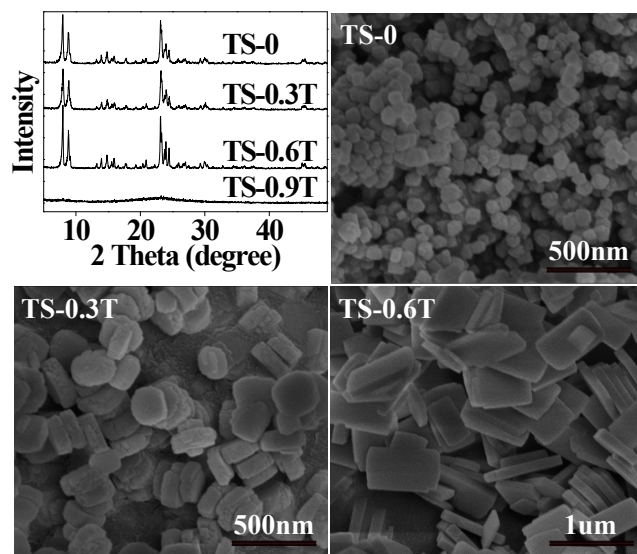

**Fig. S5** XRD patterns and SEM images of TS-1 samples being synthesized in the presence of different amounts TMG.
